# Supplementary material for: Structure and selectivity of a glutamate-specific TAXI TRAP binding protein from Vibrio cholerae
Source: PubMed Central journal article supplement (PMC11574862; doi:10.1085/jgp.202413584), 2024-11-18
Supplement: JGP_202413584_DataS1.pdf [file JGP_202413584_DataS1.pdf]

**Data S1. Multiple sequence alignment of 59 TAXI SBPs.** Sequence alignment to accompany the cladogram in Figure 1. Protein names are colour coded to match the tree in Figure 1 and the binding site residues mutated to alanine are indicated with an arrow.
