# Supplementary material for: Structure and selectivity of a glutamate-specific TAXI TRAP binding protein from Vibrio cholerae
Source: PubMed Central journal article supplement (PMC11574862; doi:10.1085/jgp.202413584), 2024-11-18

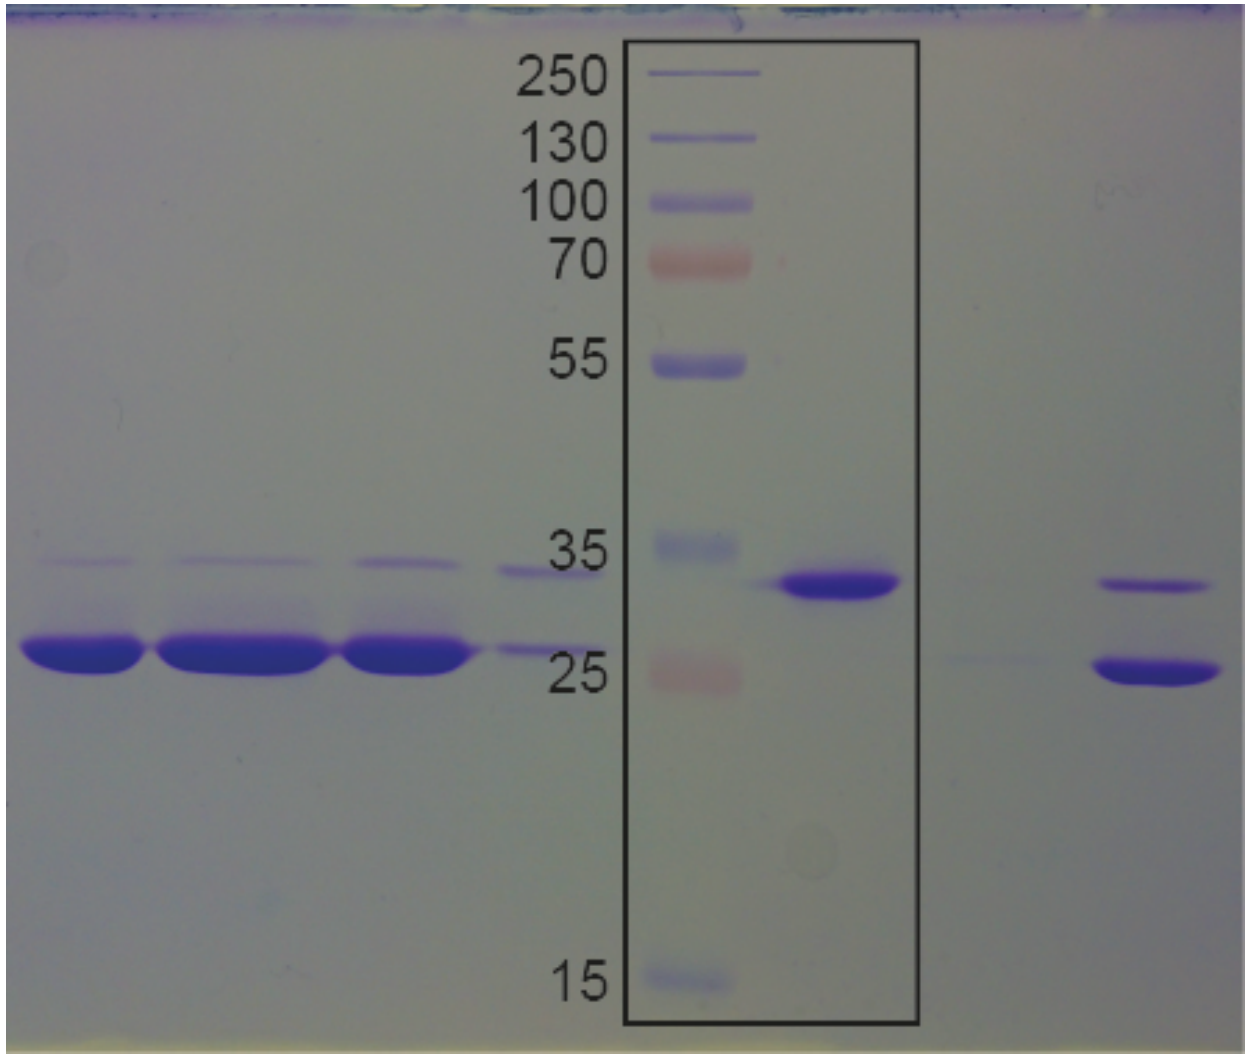

Supplement: JGP_202413584_SourceDataF3.pdf [file JGP_202413584_SourceDataF3.pdf]
